# Supplementary material
Source: PubMed Central journal article supplement (PMC3911470)
Supplement: JCM.02185-13_zjm999093020so1.pdf [file JCM.02185-13_zjm999093020so1.pdf]

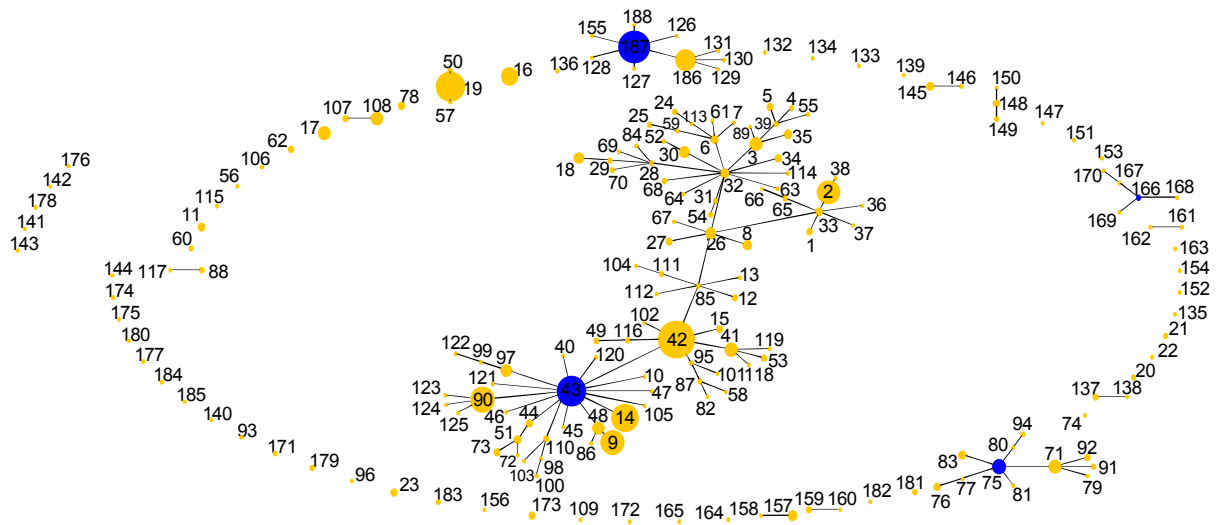

**FIG S1** eBURST of 1015 *Yersinia* isolates. A minimum number of identical loci of a group was set to zero, thus the entire population of three pathogenic *Yersinia* was included. The solid line represented one locus difference. *Y. enterocolitica*, *Y. pseudotuberculosis* and *Y. similis* subgroup were presented according to the algorithm. Group founders were marked in blue.
